# Supplementary material for: Temperate Oligocene surface ocean conditions offshore of Cape Adare, Ross Sea, Antarctica
Source: Copernicus journal article supplement (doi:10.5194/cp-17-1423-2021), 2021-07-02
Supplement: Supplementary file 2 [file Supplementary table S2.xlsx]

## Sheet: TEX86
Supplementary Table S2
Concentrations of GDGTs at SIte 274. All samples and corresponding depths, GDGT peak area values, TEX86 (Schouten et al., 2002) and BIT index values (Hopmans et al., 2004), Methane Index (Methzhang) values (Zhang et al., 2011), GDGT2/Crenarchaeol ratios (Weijers et al., 2011), GDGT-0/Crenarchaeol ratios (Blaga et al., 2009) and GDGT-2/GDGT-3 ratios (Taylor et al., 2013), and RING index (Sinninghe…
			Peak area
			GDGT-0	GDGT-1	GDGT-2	GDGT-3	GDGT-4	GDGT-4'	GDGT-IIIa	GDGT-IIIa'	SUM GDGT-IIIa	GDGT-IIa	GDGT-IIa'	SUM GDGT-IIa	GDGT-Ia	STD
Depth (mbsf)	Age (Ma)	LC code	1302	1300	1298	1296	1292	1292'	1050-1	1050-2	1050-tot	1036-1	1036-2	1036-tot	1022	744	TEX86	TEX86L	GDGT2/GDGT3	GDGT2/cren	GDGT0/cren	Methzhang	RING	SSTK10	SSTK10L	SSTK12	BIT	OUTLIER
198.24	24.4633	LC1902000007	31746400	2665210	1223340	278767	28080800	811938	142963	241930	384893	195561	0	195561	517192	1491190	0.464737	0.293556	4.3884	0.043565	1.13054	0.126053	1.87511	15.837	11.2761	12.4696	0.0376184	FALSE
201.18	24.5552	LC1902000008	43450200	3867160	1860320	460502	41096500	1.24171e+06	194161	291466	485627	418559	0	418559	557270	1567500	0.479499	0.300634	4.03977	0.0452671	1.05727	0.127518	1.93878	16.7659	12.4792	13.2135	0.0343404	FALSE
205.14	24.7062	LC1902000009	25710100	2207930	1005480	245082	22930800	538538	143317	201897	345214	280945	0	280945	393204	1463750	0.447607	0.290728	4.10263	0.0438484	1.1212	0.128436	1.87757	14.7214	9.88	11.5761	0.0425618	FALSE
209.57	24.8751	LC1902000010	36911000	3146610	1524430	357554	36923900	1047830	181879	294742	476621	320712	0	320712	500507	1419910	0.482161	0.303152	4.2635	0.0412857	0.999651	0.116943	1.99165	16.9303	12.6961	13.3453	0.0339555	FALSE
216.81	25.1511	LC1902000011	49758300	4410630	2215080	527600	50127300	1394560	213726	362766	576492	304715	0	304715	541848	1346300	0.484008	0.309658	4.19841	0.0441891	0.992639	0.121914	1.99672	17.0439	12.8467	13.4362	0.0276051	FALSE
221.41	25.3265	LC1902000012	20474700	1610610	760448	196768	18796400	679468	139460	189298	328758	247159	0	247159	365795	1446880	0.504015	0.296145	3.86469	0.0404571	1.08929	0.116488	1.91976	18.2471	14.4772	14.3998	0.0477103	FALSE
224.34	25.4382	LC1902000013	26513400	2464240	1176160	271461	26777100	743436	134892	220101	354993	277839	0	277839	458524	1365350	0.470659	0.300665	4.3327	0.0439241	0.990152	0.124453	1.99692	16.2131	11.7587	12.7709	0.039161	FALSE
229.72	25.6434	LC1902000014	29364200	2275190	1038750	260368	26693000	523053	170256	227362	397618	128802	0	128802	357934	1598250	0.444718	0.290616	3.98955	0.0389147	1.10007	0.116085	1.89508	14.529	9.64453	11.4221	0.0320681	FALSE
235.66	25.8698	LC1902000015	45266900	3437710	1616780	389885	42635300	1567560	247946	319189	567135	0	0	0	552452	1486080	0.509734	0.296963	4.14681	0.0379212	1.06172	0.109661	1.94547	18.5823	14.9434	14.6683	0.0306448	FALSE
237.94	25.9568	LC1902000016	43773800	3571060	1716110	442929	41383500	1233210	197440	295574	493014	0	0	0	580210	1387970	0.48716	0.29949	3.87446	0.0414685	1.05776	0.118521	1.94092	17.2368	13.1036	13.5907	0.0300368	FALSE
239.36	26.0109	LC1902000017	28909000	2630310	1268800	303116	29207000	1337550	170380	102612	272992	0	0	0	421970	1376270	0.525196	0.301935	4.18586	0.0434416	0.989797	0.120939	2.01483	19.47	16.2034	15.3792	0.0288491	FALSE
246.31	26.2759	LC1812000127	30750900	2424700	1183850	288821	26093900	717246	574446	816661	1391107	0	44455.8	44455.8	349540	1415030	0.474561	0.303756	4.09891	0.0453688	1.17847	0.126915	1.83704	16.4584	12.0767	12.9673	0.0818795	FALSE
248.16	26.3464	LC1902000018	12490000	965208	409307	108369	9746486	293345	99875.8	107620	207496	64223.2	0	64223.2	292061	1098060	0.456597	0.276021	3.77697	0.0419953	1.28149	0.128692	1.76024	15.3121	10.6127	12.0492	0.0587399	FALSE
252.17	26.4993	LC1902000019	8079520	658088	296095	74300.8	6935210	203045	65461.8	81203.7	146666	0	0	0	219203	1187880	0.465633	0.287895	3.98508	0.0426945	1.165	0.125936	1.84819	15.8942	11.3491	12.5155	0.0613937	FALSE
258.88	26.7551	LC1902000020	33986700	2861440	1314190	358318	31501300	721087	146605	251498	398103	0	0	0	566795	1229540	0.455486	0.289856	3.66766	0.0417186	1.0789	0.123351	1.91474	15.2397	10.5221	11.9913	0.0358887	FALSE
264.31	26.9622	LC1902000021	21604000	1996720	907963	225525	19970300	537900	121089	174109	295198	0	0	0	429294	1250630	0.455654	0.290065	4.026	0.0454657	1.08181	0.13242	1.91241	15.2506	10.5358	12	0.0553317	FALSE
267.22	27.0731	LC1902000022	31069000	2474410	1121960	271547	27623000	747620	121620	186745	308365	0	0	0	341244	1191240	0.463896	0.290068	4.13173	0.0406169	1.12475	0.119978	1.87996	15.7831	11.2075	12.4265	0.0312453	FALSE
270.18	27.186	LC1902000023	18936500	1493090	689386	169361	17274900	481013	311134	449777	760911	0	0	0	302923	1201950	0.472937	0.293127	4.07051	0.0399068	1.09619	0.116962	1.90562	16.3566	11.9444	12.8857	0.0691363	FALSE
277.72	27.4742	LC1902000024	22663900	1696270	766202	196118	19760000	600320	98739	143907	242646	0	0	0	553660	1239450	0.479498	0.288199	3.90684	0.0387754	1.14696	0.115496	1.86631	16.7658	12.4791	13.2135	0.0447289	FALSE
284.83	27.753	LC1812000126	21337500	1654880	727832	193031	18677800	489090	96883.5	131186	228070	0	0	0	238500	1395940	0.460042	0.282572	3.77054	0.0389678	1.1424	0.118465	1.8653	15.5354	10.8935	12.2281	0.0304876	FALSE
286.86	27.8326	LC1902000025	33382900	2679770	1215570	315945	30217300	1119270	169901	250557	420458	0	0	0	531392	1109330	0.497281	0.288646	3.84741	0.0402276	1.10476	0.118468	1.90633	17.8476	13.9284	14.0799	0.0378292	FALSE
292.37	28.0486	LC1902000026	33214000	2863120	1282750	308279	29655900	994033	189974	294596	484570	0	0	0	461617	1386600	0.474482	0.28799	4.161	0.0432545	1.11998	0.126884	1.88754	16.4534	12.0702	12.9633	0.0369151	FALSE
296.36	28.2051	LC1902000027	22393800	2235340	1042090	243927	23061600	734494	221790	289043	510833	0	0	0	547882	1319600	0.474761	0.295934	4.27214	0.0451872	0.971043	0.128905	2.01636	16.4709	12.093	12.9773	0.0547344	FALSE
307.41	28.6383	LC1902000028	17839000	1454770	610068	172820	16254900	390936	357530	470132	827662	0	0	0	340810	1276850	0.44656	0.272637	3.53008	0.0375313	1.09745	0.118498	1.90011	14.6518	9.79461	11.5204	0.0770471	FALSE
314.34	28.91	LC1902000029	9654500	846357	406005	100585	9070590	289515	72061.3	97087.3	169149	0	0	0	272356	1282870	0.484702	0.300089	4.03644	0.0447606	1.06437	0.12629	1.93448	17.0865	12.9032	13.4703	0.0538911	FALSE
321.64	29.1977	LC1812000125	21115200	1849350	875075	189092	20533100	592305	134608	171830	306438	0	0	0	281779	1304770	0.472492	0.30035	4.62777	0.0426178	1.02835	0.1212	1.96368	16.3286	11.9081	12.8633	0.0365307	FALSE
324.74	29.3292	LC1902000030	6648780	584164	265791	70577.7	6031540	195659	42492.2	60168.5	102661	0	0	0	134436	1318400	0.476645	0.288736	3.76593	0.0440669	1.10234	0.128787	1.90166	16.5886	12.2466	13.0715	0.045519	FALSE
333.63	29.7064	LC1902000031	21260300	1811890	859347	208624	19137000	470193	132257	206882	339139	0	0	0	539269	1337990	0.459146	0.298399	4.11912	0.044905	1.11095	0.128068	1.88778	15.4774	10.8204	12.1817	0.0571661	FALSE
335.27	29.776	LC1902000032	24043400	2079520	967435	238600	22025900	733743	102794	169172	271966	0	0	0	316256	1272380	0.482616	0.294451	4.05463	0.0439226	1.0916	0.126148	1.91199	16.9584	12.7332	13.3677	0.0313981	FALSE
342.9	30.0998	LC1902000033	21351000	2010900	983020	219133	19568300	889728	92649.8	152240	244890	0	0	0	353674	1273760	0.509869	0.305946	4.48595	0.0502353	1.0911	0.135737	1.92053	18.5902	14.9543	14.6746	0.0388204	FALSE
352.62	30.5122	LC1902000035	53744900	4721390	2539490	613524	54543800	2076680	177899	313934	491833	0	0	0	607816	1345900	0.52554	0.322499	4.13919	0.0465587	0.985353	0.122093	2.0139	19.4894	16.2315	15.3948	0.025477	FALSE
352.94	30.5258	LC1902000034	33381300	2781380	1405720	343996	30509400	1122670	149710	262947	412657	0	0	0	480731	1296800	0.508048	0.310238	4.08644	0.046075	1.09413	0.125296	1.91465	18.4839	14.8059	14.5895	0.0347362	FALSE
361.18	30.8754	LC1902000036	148619	14784700	1100220	661898	143774	13693300	55488	103972	159460	0	48139.3	48139.3	185544	1309620	0.51109	0.0664913	1.66222	7.65243	1.0337	0.544592	2.4341	18.6612	15.0538	14.7315	0.744512	TRUE
363.66	31.0089	LC1812000124	13058600	1120530	556581	143559	13106200	348277	56664	94043.9	150708	26946.9	0	26946.9	135053	1240430	0.483376	0.305701	3.87702	0.042467	0.996368	0.119192	1.99346	17.0051	12.7951	13.4051	0.0267948	FALSE
371.48	31.3612	LC1902000037	27221400	2220810	1231820	265430	25106300	851332	110056	198595	308651	0	43134.9	43134.9	474426	1395000	0.513981	0.331307	4.64085	0.0490642	1.08425	0.12529	1.92121	18.8288	15.2895	14.8657	0.0361513	FALSE
382.2	31.8443	LC1812000123	11081200	897067	412316	100357	9631810	244439	43985	62193.9	106179	27835.7	0	27835.7	157141	1081160	0.457697	0.292477	4.10849	0.0428077	1.15048	0.124911	1.85664	15.3835	10.7023	12.1064	0.0335428	FALSE
383.62	31.9082	LC1902000038	8794040	706531	342342	82905.7	7560750	268739	40129.9	43343.1	83473	0	0	0	313105	1017550	0.495522	0.302481	4.12929	0.0452788	1.16312	0.126297	1.85623	17.7423	13.785	13.9955	0.0572291	FALSE
390.44	32.2155	LC1902000039	25574100	1698830	1025100	199355	20527300	716908	87662.6	150272	237935	0	0	0	333704	1422670	0.533313	0.350667	5.14208	0.0499384	1.24586	0.120959	1.79576	19.9256	16.865	15.7441	0.0336334	TRUE
391.37	32.2574	LC1902000040	15543500	1033580	575150	124431	12619100	434875	94623.9	145669	240293	0	0	0	275815	1348180	0.523264	0.33185	4.62224	0.0455777	1.23174	0.117207	1.80587	19.3605	16.046	15.2915	0.0475991	FALSE
393.88	32.3705	LC1902000041	18578900	1319370	717135	159786	15421700	534597	120329	207613	327942	0	0	0	457869	1431350	0.516871	0.326521	4.4881	0.0465017	1.20472	0.120991	1.82563	18.9954	15.525	14.9991	0.0576466	FALSE
401.87	33.3129	LC1902000042	1020170	64152.1	29792.2	6987.6	602119	16555.4	5698.6	6965.86	12664.5	0	56725.7	56725.7	9559.13	0	0.453966	0.295171	4.26358	0.0494789	1.6943	0.14026	1.50559	15.1404	10.3982	11.9117	0.0487857	TRUE
404.66	33.748	LC1812000122	13123800	1027500	478013	115855	13254500	324945	83522	132528	216050	38412	0	38412	18489.5	1171570	0.472079	0.294821	4.12596	0.0360642	0.990139	0.106663	1.99999	16.3026	11.8744	12.8425	0.0242692	FALSE
