# Supplementary material for: Temperate Oligocene surface ocean conditions offshore of Cape Adare, Ross Sea, Antarctica
Source: Copernicus journal article supplement (doi:10.5194/cp-17-1423-2021), 2021-07-02
Supplement: Supplementary file 3 [file Supplementary table S3.xlsx]

## Sheet: counts cleaned
Supplementary Table S3
Total palynomorph assemblage counts DSDP Site 274 cores 21-43
							In-situ P-cyst																		Reworked P-cyst								In-situ G-cyst
Sample code (DSDP Leg 28, Site 274... core, section, interval)	Sample depths (mbsf)	Age (Ma)	Lycopodium spores	Lycopodium tablet size	Dry weight g	Lycopodium/g	Brigantedinium pynei	Brigantedinium simplex	Brigantedinium spp. pars.	Lejeunecysta spp.pars	Lejeunecysta acuminata	Lejeunecysta adeliensis	Lejeunecysta attenuata	Lejeunecysta fallax	Lejeunecysta katatonos	Lejeunecysta rotunda	Lejeuenacysta sp. A	Malvinia escutiana	Protoperidinium indet.	Selenopemphix antarctia	Selenopemphix brinkhusii	Selenopemphix nephroides	Selenopemphix spp. pars	Dinocyst sp. 1	Alterbidinium distinctum	Deflandrea spp. Pars	Moria zachosii	Phthanoperidinium spp. Pars	Senegalinium spp.	Spinidinium spp. Pars	Vozzhennikovia spp. Pars	Other P-cyst reworked	Achomosphaera alcicornu	Batiacasphaera spp. Pars	Batiacasphaera cooperi	Batiacasphaera compta	Batiacasphaera sp. B sensu Bijl et al., 2018	Cerebrocysta spp. Pars	Cleistosphaeridium sp A. sensu Bijl et al., 2018	Corrudinium spp. Pars	Corrudinium labradori	Gelatia inflata	Hystrichokolpoma bullatum	Impagidinium cf aculeatum	Impagidinium cantabrigiense(?)	Impagidinium velorum	Impagidinium victorium	Impagidinium paradoxum	Impagidinium pallidum
21R - 2W 125-129 cm	192.77	24.4	390	9666	10.3943	929.933	1		10		3	2					4	39				2			3	44	3	6	3	5	9			24				9			3	3			1		2	2	3
21R - 6W 22-26 cm	198.24	24.4515	214	9666	10.919	885.246	2	2	23	2	5	4	1	1			4	68				2			2	27	1	5	4	2	15			20				3			3	3						2	2
22R-2W 16-20 cm	201.18	24.5427	146	9666	10.507	919.958	1	3	11	3	8			2	1	4	6	63			3	1		2	2	16		5	5	6	17			22	1			5				2					1	1
22R-4W - 112-116 cm:	205.4	24.7025	391	19855	9.9883	1987.83	3		20	5	11			2	1		5	35			1	2		3	2	30	2	4	1	2	14			15								2		1				1	1
23R - 1W 6-10 cm	209.08	24.8418	111	9666	11.0544	874.403	6		17	6	4			1			5	38			7	2	1		2	25		7	3	2	14			12				4			2							2
23R-5W 131-135 cm	216.81	25.1344	289	19855	10.0266	1980.23	2		17	2	7	1	1				13	71			9	1	1		2	33		7	5	3	18			27				10				1		1
24R - 2W 139-143 cm	221.41	25.3086	380	9666	10.478	922.504			3	1							2	14			1					3		1	1		10			5				1			4			1
24R-4W 132-136cm	224.34	25.4195	206	19855	10.4878	1893.15			4	1								87							2	23		3			8			14				2											1
25R - 2W 20-24cm	229.72	25.6231	138	9666	11.7455	822.953	1		15	2	5						7	22			2			5	3	28		21	6	2	18			40		1		22			7			1		1	1		2
25R-6W 14-18cm	235.66	25.848	284	19855	8.3466	2378.81			15	4	1						2	14						5	3	31	1	3		1	14			20				11			1					1			2
26R - 2W 14-18cm	239.16	25.9805	52	9666	12.0121	804.689			4	4							5	39			3			1	2	19		3		3	0			7							1							1	1
26R - 6W 109-113 cm	246.61	26.2625	125	9666	9.7925	987.082	1		30	3	1	1			2		8	8			2			6	3	12	2	8	3	1	5			17				2									1		1
27R - 1W 114-118 cm	248.16	26.3212	123	9666	11.5526	836.695			2	2		1					3	5						3	4	12		2	2	6	7			12				2		1
27R-4W 65-69 cm	252.17	26.473	330	19855	10.6469	1864.86	3		7	2							5	16			1		1	2		25		6		2	12			17				3		1
28R-2W 36-40 cm	258.88	26.727	338	19855	10.478	1894.92	1		11	2	1						5	41						1	6	23	2	7	3	3	5			42				2		1									5
28R-5W 131-135	264.31	26.9326	389	19855	11.0748	1792.81			6	1							1	83						8	5	22		8	2	1	17			18		1		3						2			1		1
29-1W 120-124cm	267.22	27.0427	212	19855	9.9355	1998.39			20	2	1			2			6	14			1			5	3	13	2	5	1	3	10		1	82		2		6			3	1					1		5
29R-3W-116-120 cm	270.18	27.1548	186	19855	8.6053	2307.3			13					2			3	29						7	3	12	2	4	2	6	8		1	72			10	4			1
30R-2W-20-24 cm	277.72	27.4413	233	19855	9.6703	2053.19			1		1						2	52					1	2		8		5	6	4	11			67			53	5								1		1
30R-6W-131-135 cm	284.83	27.7209	74	9666	9.497	1017.8			9		4							21					6	13	3	7		1		1	8			112				3						1
31R-1W-144-148 cm	286.86	27.8007	432	9666	10.034	963.325			5		6						2	72					1	6	6	28	1	7	18	15	23			125				36					1	1				1
31R-5W- 95-99CM	292.37	28.0173	109	9666	9.8879	977.558				3	6					1		28					1	19	3	13		8	5	3	12			9			61	5		1		1				3		1	1
32R-1W 134-138 cm	296.36	28.1742	169	19855	9.5424	2080.71			5		4						7	16			5			2	2	35	1	5	4	4	18			87				22		1									2
32R-5W 95-99 cm	301.97	28.3948	88	9666	10.7017	903.221			6		3							29	1	2	3			5		5		2	1	3	14.5			5		3	106	26			1							2	1
33R-2W 139-143cm	307.41	28.6087	176	19855	9.7153	2043.68			5		5						3	18			1			7	1	21	1.5	5	3	3	19			62				6				1
33R-6W 138-142	313.4	28.8443	110	9666	7.9228	1220.02					2						1	15						1	4	20		13	2	2	16			30			28	5	1		1		1					1	3
34R - 1w 32-36 cm	314.34	28.8812	95	9666	10.0694	959.938			3	1	4			2			2	11						2	3	11		13	5	1	8			6			67				5		2	1					1
34R - 6W 12-16cm	321.64	29.1699	146	9666	8.505	1136.51			1									10							2	29		1	1	1	5			40				2			1						1
35R-2W 115-119	325.67	29.3429	58	9666	10.6685	906.032			7		2			2			4	4	4		1				6	19		18	3	5	14			3			68	3									1		2
36R-1W-111-115 cm	333.63	29.6847	82	9666	10.3925	930.094			10		2	1		1	1	1	5	4	4	1			1	5	3	17		46	10	11	13	1		13			153	11			1								8
36R-2W 125-129 cm	335.27	29.7552	134	9666	10.3571	933.273			11	1	5			4		2	4	7	1	1			1	1		9		43	14	6	16			5			4	20	3		6	1					1		2
37R-1W 88-92 cm	342.9	30.0828	82	9666	10.6232	909.895			23	17	1					1		7	4	1			1	17	4	21	1	65	13	5	26			23			20		0	0		2	0				0	0	0
38R-1W 142-145 cm	352.62	30.5002	81	9666	10.4204	927.604					3	1					4	9		1			3	59	4	8		23	12	5	17			14				5					1					1
38R-2W 60-64 cm	352.94	30.5139	106	9666	10.1214	955.006			8	12								20					1	23	1	34		43	11	6	24			4			3			1			1						1
39R 1W 116-119 cm	361.18	30.8678	596	19855	10.809	1836.9			2	2	1						1	10		2				21	2	77	1	31	14	4	39										7						2	3
39R 2W 114-117 cm	363.66	31.0269	78	9666	10.2848	939.834			4	6								3.5	0.5				2	13	3	31		47	9	9	36			0			0		0	3		3	4				0	0	2
40R 1W 96-100 cm	371.48	31.38	58	9666	10.5179	919.005			10	6								8					0	11	7	44	2	25	9	11	26	1		6			0		0	0		0	0				0	1	1
41R 2W 68-72cm	382.2	31.864	50	9666	10.4021	929.235			4	2				1				6						9	3	34		2	9	24	35			6									6				3
41R 3W 60-64cm	383.62	31.9281	157	19855	9.9947	1986.55			3		2						5	3		2		1		7	7	60	1	19	5	9	51																1		2
42 1W 93-95 cm	390.44	32.236	127	19855	11.2887	1758.84			10		1						4	3		1			1	15	10	55	4	46	13	8	69			3									4				1
42 2W 35-39 cm	391.37	32.278	83	9666	10.5779	913.792			5	9								3					5	44	15	52	2	166	68	70	81	1					2		0	6			3				1	0	0
43R 2W 135-136 cm	401.87	33.294	18	19855	11.9393	1663			1	1								1						118	6	56	1	277	13	9	217			12			1										2
43R 4W 114-118cm	404.66	33.7	72	9666	9.5152	1015.85			26	5								6					2	677	58	129		1074	43	73	1063	1					0		0	0		0	3				0
[truncated: 37 more columns]
