# Supplementary material for: Temperate Oligocene surface ocean conditions offshore of Cape Adare, Ross Sea, Antarctica
Source: Copernicus journal article supplement (doi:10.5194/cp-17-1423-2021), 2021-07-02
Supplement: Supplementary file [file cp-17-1423-2021-supplement-title-page.pdf › cp-17-1423-2021-supplement-title-page.pdf]

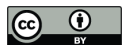

## *Supplement of*

# **Temperate Oligocene surface ocean conditions offshore of Cape Adare, Ross Sea, Antarctica**

**Frida S. Hoem et al.**

*Correspondence to:* Frida S. Hoem (f.s.hoem@uu.nl)

- cp-17-1423-2021-supplement-title-page.pdf
- Sup.fig01.pdf
- Sup.fig02.pdf
- Sup.fig03.pdf
- Supplementary Information.pdf
- Supplementary table S1.xlsx
- Supplementary table S2.xlsx
- Supplementary table S3.xlsx
- Supplementary table S4.xlsx
- \_\_MACOSX
  - .\_Sup.fig01.pdf
  - .\_Sup.fig02.pdf
  - .\_Sup.fig03.pdf
  - .\_Supplementary Information.pdf
  - .\_Supplementary table S1.xlsx
  - .\_Supplementary table S2.xlsx
  - .\_Supplementary table S3.xlsx
  - .\_Supplementary table S4.xlsx

The copyright of individual parts of the supplement might differ from the article licence.
